# Supplementary material
Source: Research Square preprint supplement (doi:10.21203/rs.3.rs-10027528/v1)
Supplement: Supplementary file 1 [file 8dc9c067acc526df0d275051.docx]

**1. Article Type**

- **Select on the website:** Original Research

**2. Authors & Corresponding Author Details**

- **Author 1 (Corresponding Author):**
  - *First Name:* Aniket Bhagwat
  - *Last Name:* Mohite
  - *Email:* mohiteaniket4646@gmail.com
  - *ORCID:* 0009-0008-1247-1076
  - *Affiliation:* Department of Design Engineering, Padmabhooshan Vasantraodada Patil Institute of Technology, Budhgaon, Dr. Babasaheb Ambedkar Technological University, Lonere, Maharashtra, India
- **Author 2:**
  - *First Name:* Pankaj P.
  - *Last Name:* Awate
  - *Email:* *(Enter Dr. Awate's institutional email address)*
  - *ORCID:* 0000-0003-3864-3370
  - *Affiliation:* Department of Design Engineering, Padmabhooshan Vasantraodada Patil Institute of Technology, Budhgaon, Dr. Babasaheb Ambedkar Technological University, Lonere, Maharashtra, India
